CORRECTION

# Correction: Dose-Dependent ATP Depletion and Cancer Cell Death following Calcium Electroporation, Relative Effect of Calcium Concentration and Electric Field Strength

Emilie Louise Hansen, Esin Bengisu Sozer, Stefania Romeo, Stine Krog Frandsen, P. Thomas Vernier, Julie Gehl

[Fig 3](#) is incorrect. Please see the correct [Fig 3](#) here.

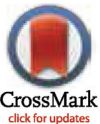

 OPEN ACCESS

**Citation:** Hansen EL, Sozer EB, Romeo S, Frandsen SK, Vernier PT, Gehl J (2015) Correction: Dose-Dependent ATP Depletion and Cancer Cell Death following Calcium Electroporation, Relative Effect of Calcium Concentration and Electric Field Strength. PLoS ONE 10(5): e0128034. doi:10.1371/journal.pone.0128034

**Published:** May 7, 2015

**Copyright:** © 2015 Hansen et al. This is an open access article distributed under the terms of the [Creative Commons Attribution License](#), which permits unrestricted use, distribution, and reproduction in any medium, provided the original author and source are credited.

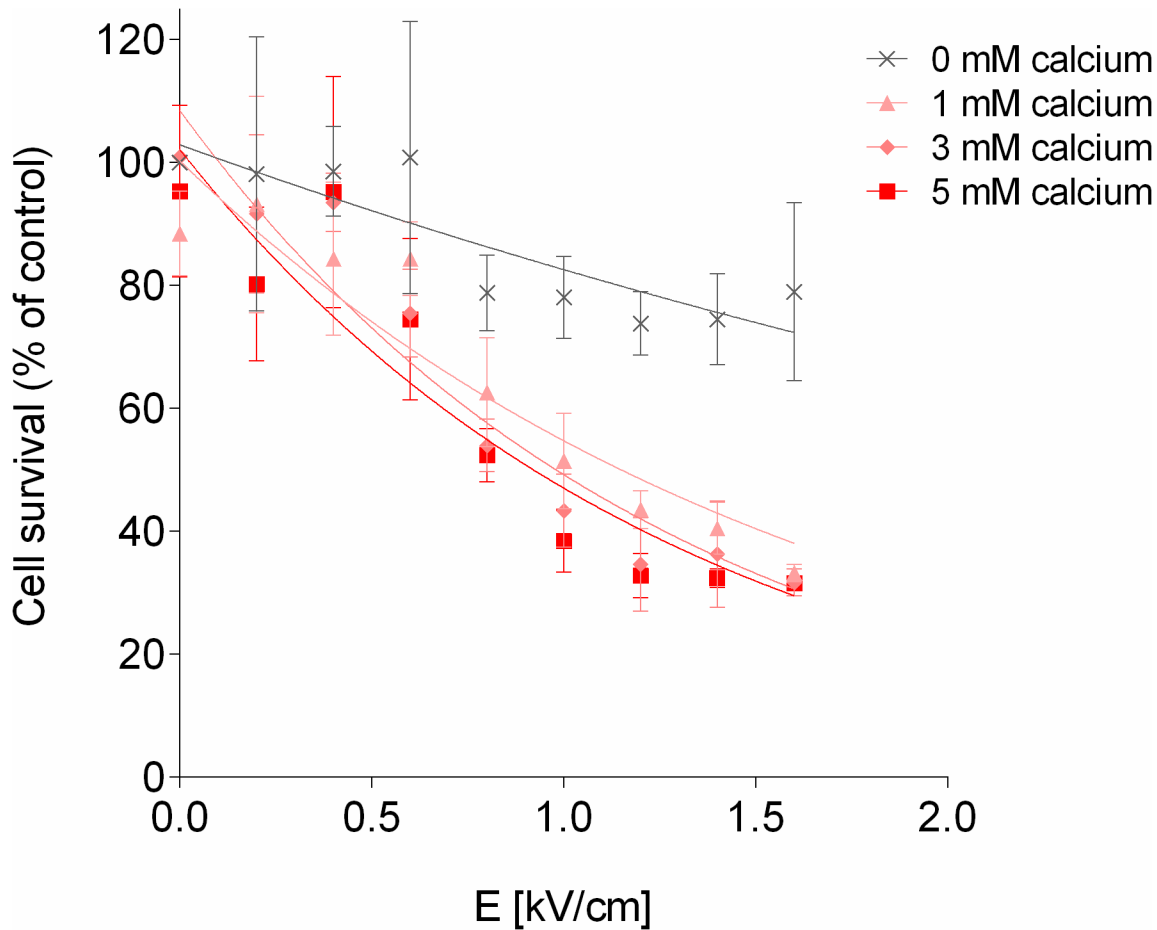

**Fig 3. SW780 viability as a function of pulsed electric field and extracellular calcium concentration.** Cell survival (%) versus electric field (E) at calcium electroporation using 0, 1, 3, or 5mM calcium in SW780 human bladder cancer cells assessed using MTS assay 24 hours after treatment. Electric field amplitude of 0.8 kV/cm, 1.0 kV/cm, 1.2 kV/cm, 1.4 kV/cm, or 1.6 kV/cm was applied. Fitting curves were derived using MATLAB software. Results are illustrated as percentage of control (no electroporation, no added calcium), mean  $\pm$  S.D., n = 6.

doi:10.1371/journal.pone.0128034.g001

### Reference

1. Hansen EL, Sozer EB, Romeo S, Frandsen SK, Vernier PT, Gehl J. (2015) Dose-Dependent ATP Depletion and Cancer Cell Death following Calcium Electroporation, Relative Effect of Calcium Concentration and Electric Field Strength. PLoS ONE 10(4): e0122973. doi: [10.1371/journal.pone.0122973](https://doi.org/10.1371/journal.pone.0122973) PMID: [25853661](https://pubmed.ncbi.nlm.nih.gov/25853661/)
